# Supplementary material
Source: MDPI journal article supplement (https://www.mdpi.com/2071-1050/16/5/1758)
Supplement: s1 [file s1]

Archive with 2 entries (2 files):
- SUMPLEMENTORY TABLE S1_KOR.odt
- SUMPLEMENTORY TABLE S1_KOR.pdf
