# Supplementary material
Source: MDPI journal article supplement (https://www.mdpi.com/2071-1050/16/5/1758)
Supplement: s1 [file s1 › SUMPLEMENTORY TABLE S1_KOR.odt]

THE FIVE SUF GOALS CHECKLIST
–  A MEASUREMENT TOOL  FOR  MEASURING THE SPATIO-FUNCTIONAL POTENTIAL OF A SMART CITY’S BLUE-GREEN INFRASTRUCTURE AND RECREATIONAL AREAS

Goal No.
Goal agenda
successfully
present
lacking
 partially present

G 1

MORPHOLOGY
1.1 compact urban structure (size)


1.2. urban structure that is easy to understand for users 
– e.g., basic urban grid (configuration)


1.3.  human scale of the urban structure (density)


1.4. presence of blue-green infrastructure, public spaces, open space (land use)


1.5 masterplan as the basis of the project implementation


TOTAL SCORE:


G 2
ECOLOGY AND ENVIRONMENTAL PROTECTION
2.1. the presence of blue-green infrastructure/ high percentage of the space with vegetative cover


2.2 biophilia


2.3. well-being oriented design thanks to big scale green areas


2.4. biodiversity


2.5. renewable energy for zero CO2 emissions solutions etc.


TOTAL SCORE:


 G 3
ACCESSIBILITY
3.1. the proximity of blue-green infrastructure and recreational spaces (400 m distance)


3.2 traffic priority (pedestrian traffict preferred)


3.3. the existence of an extensive public transport infrastructure


3.4. the existence of an extensive bikelane infrastructure


3.5. diversified parking structure.


TOTAL SCORE:


 G 4
MULTIFUNCTIONALITY AND ACTIVITIES
4.1. multifunctional character of blue-green infrastructure & recreational spaces


4.2. sense of welcoming, liveable and vibrant public spaces for different social and age groups


4.3. technical, spatial and time /process inclusiveness of spaces


4.4. active ground floors of surrounding development (retail, public uses etc.)


4.5. an easy identification and variety of green and recreational spaces in order to counteract spatial monotony


TOTAL SCORE:


G 5
IDENTITY  AND AESTHETICS
5.1. the continuity of local identity/ preservation of historical and cultural heritage


5.2. the creation of new areas of high identity value/ new landmarks/ new architectural icons


5.3.  the human scale preservation and enhancement of the sense of safety


5.4.  the emphasis on individualized design rather than typified solutions, good orientation in space


5.5. the originality and high quality of aesthetic and material solutions of development, public spaces and street furniture


TOTAL SCORE:
