# Supplementary material
Source: MDPI journal article supplement (https://www.mdpi.com/2071-1050/16/5/1758)
Supplement: s1 [file s1 › SUMPLEMENTORY TABLE S1_KOR.pdf]

# THE FIVE SUF GOALS CHECKLIST

– A MEASUREMENT TOOL FOR MEASURING THE SPATIO-FUNCTIONAL POTENTIAL OF A SMART CITY'S BLUE-GREEN INFRASTRUCTURE AND RECREATIONAL AREAS

| Goal No.                                        | Goal agenda                                                                                                                  | successfully present | lacking | partially present |
|-------------------------------------------------|------------------------------------------------------------------------------------------------------------------------------|----------------------|---------|-------------------|
| <b>G 1 MORPHOLOGY</b>                           | 1.1 compact urban structure (size)                                                                                           |                      |         |                   |
|                                                 | 1.2. urban structure that is easy to understand for users<br>– e.g., basic urban grid (configuration)                        |                      |         |                   |
|                                                 | 1.3. human scale of the urban structure (density)                                                                            |                      |         |                   |
|                                                 | 1.4. presence of blue-green infrastructure, public spaces, open space (land use)                                             |                      |         |                   |
|                                                 | 1.5 masterplan as the basis of the project implementation                                                                    |                      |         |                   |
| TOTAL SCORE:                                    |                                                                                                                              |                      |         |                   |
| <b>G 2 ECOLOGY AND ENVIRONMENTAL PROTECTION</b> | 2.1. the presence of blue-green infrastructure/ high percentage of the space with vegetative cover                           |                      |         |                   |
|                                                 | 2.2 biophilia                                                                                                                |                      |         |                   |
|                                                 | 2.3. well-being oriented design thanks to big scale green areas                                                              |                      |         |                   |
|                                                 | 2.4. biodiversity                                                                                                            |                      |         |                   |
|                                                 | 2.5. renewable energy for zero CO <sub>2</sub> emissions solutions etc.                                                      |                      |         |                   |
| TOTAL SCORE:                                    |                                                                                                                              |                      |         |                   |
| <b>G 3 ACCESSIBILITY</b>                        | 3.1. the proximity of blue-green infrastructure and recreational spaces (400 m distance)                                     |                      |         |                   |
|                                                 | 3.2 traffic priority (pedestrian traffict preferred)                                                                         |                      |         |                   |
|                                                 | 3.3. the existence of an extensive public transport infrastructure                                                           |                      |         |                   |
|                                                 | 3.4. the existence of an extensive bikelane infrastructure                                                                   |                      |         |                   |
|                                                 | 3.5. diversified parking structure.                                                                                          |                      |         |                   |
| TOTAL SCORE:                                    |                                                                                                                              |                      |         |                   |
| <b>G 4 MULTIFUNCTIONALITY AND ACTIVITIES</b>    | 4.1. multifunctional character of blue-green infrastructure & recreational spaces                                            |                      |         |                   |
|                                                 | 4.2. sense of welcoming, liveable and vibrant public spaces for different social and age groups                              |                      |         |                   |
|                                                 | 4.3. technical, spatial and time /process inclusiveness of spaces                                                            |                      |         |                   |
|                                                 | 4.4. active ground floors of surrounding development (retail, public uses etc.)                                              |                      |         |                   |
|                                                 | 4.5. an easy identification and variety of green and recreational spaces in order to counteract spatial monotony             |                      |         |                   |
| TOTAL SCORE:                                    |                                                                                                                              |                      |         |                   |
| <b>G 5 IDENTITY AND AESTHETICS</b>              | 5.1. the continuity of local identity/ preservation of historical and cultural heritage                                      |                      |         |                   |
|                                                 | 5.2. the creation of new areas of high identity value/ new landmarks/ new architectural icons                                |                      |         |                   |
|                                                 | 5.3. the human scale preservation and enhancement of the sense of safety                                                     |                      |         |                   |
|                                                 | 5.4. the emphasis on individualized design rather than typified solutions, good orientation in space                         |                      |         |                   |
|                                                 | 5.5. the originality and high quality of aesthetic and material solutions of development, public spaces and street furniture |                      |         |                   |
| TOTAL SCORE:                                    |                                                                                                                              |                      |         |                   |
